# Supplementary material for: S-Nitrosylation of Tissue Transglutaminase in Modulating Glycolysis, Oxidative Stress, and Inflammatory Responses in Normal and Indoxyl-Sulfate-Induced Endothelial Cells
Source: MDPI journal article supplement (doi:10.3390/ijms241310935), 2023-06-30
Supplement: s1 [file s1]

## Supplemental Table and Figures

**Supplemental Table S1: Antibodies used in this study.**

| <b>Antibody Name</b>  | <b>Company</b>                | <b>M.W. (kDa)</b> |
|-----------------------|-------------------------------|-------------------|
| ACE                   | Santa Crus (sc-23908)         | 195               |
| Fibronectin           | Abcam (ab6328)                | 220               |
| HO1                   | Abcam (ab68477)               | 33                |
| PKM2                  | Cell Signaling (#4053)        | 60                |
| GAPDH                 | Sigma-Aldrich (G8795)         | 37                |
| TGM2 cub7402          | Labvision, Thermo Fisher      | 80                |
| G6PD                  | ThermoFisher (MA5-15918)      | 59                |
| CCN1                  | Santa Crus (sc-374129)        | 40                |
| I $\kappa$ B $\alpha$ | Cell Signaling (#9242)        | 39                |
| NF $\kappa$ B         | Invitrogen (PA5-27617)        | 65                |
| eNOS                  | Abcam (ab76198)               | 133               |
| Phospho-eNOS          | Cell Signaling (#9571)        | 140               |
| $\beta$ -actin        | Novus biologicals (NB600-501) | 42                |
| 2° Ab                 |                               |                   |
| Goat Anti-Mouse       | Jackson Immuno (115-035-003)  |                   |
| Goat Anti-Rabbit      | Jackson Immuno (111-036-045)  |                   |

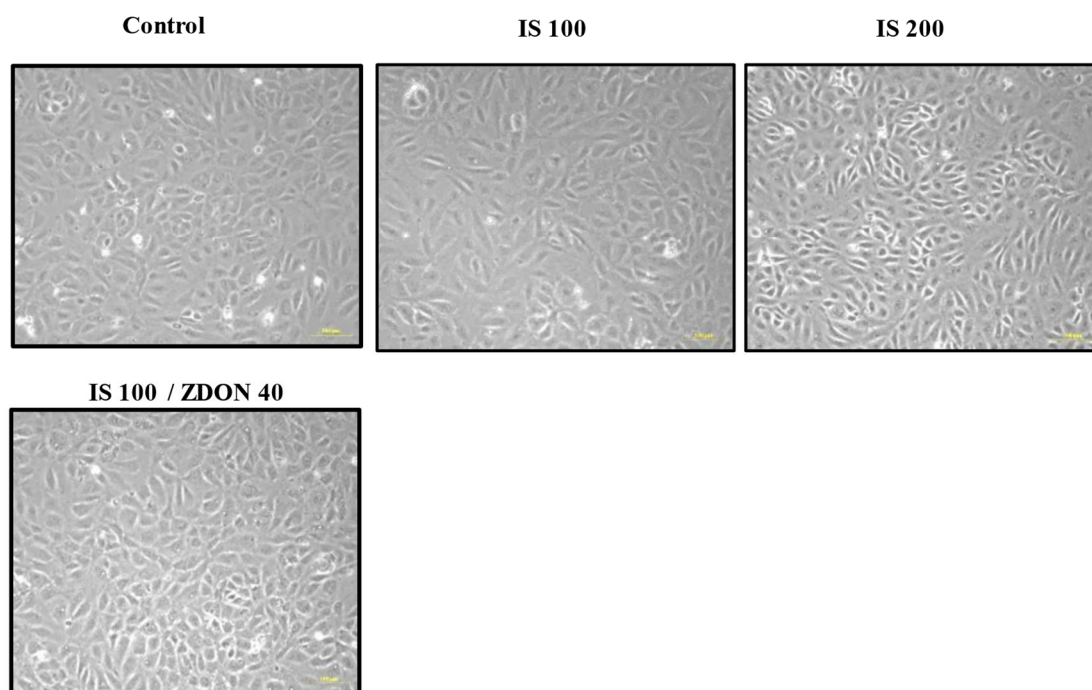

**Supplemental Figure S1. Morphology of cells after treated with chemicals or/and IS.** HUVEC cells (passage 2-3) were grown to confluent on the 6-well dish. The morphology of HUVEC cells pretreated with either ZDON (40  $\mu$ M) followed by 4 hours of incubation with IS (100, or 200  $\mu$ M and imaged under light microscopy (200 x).

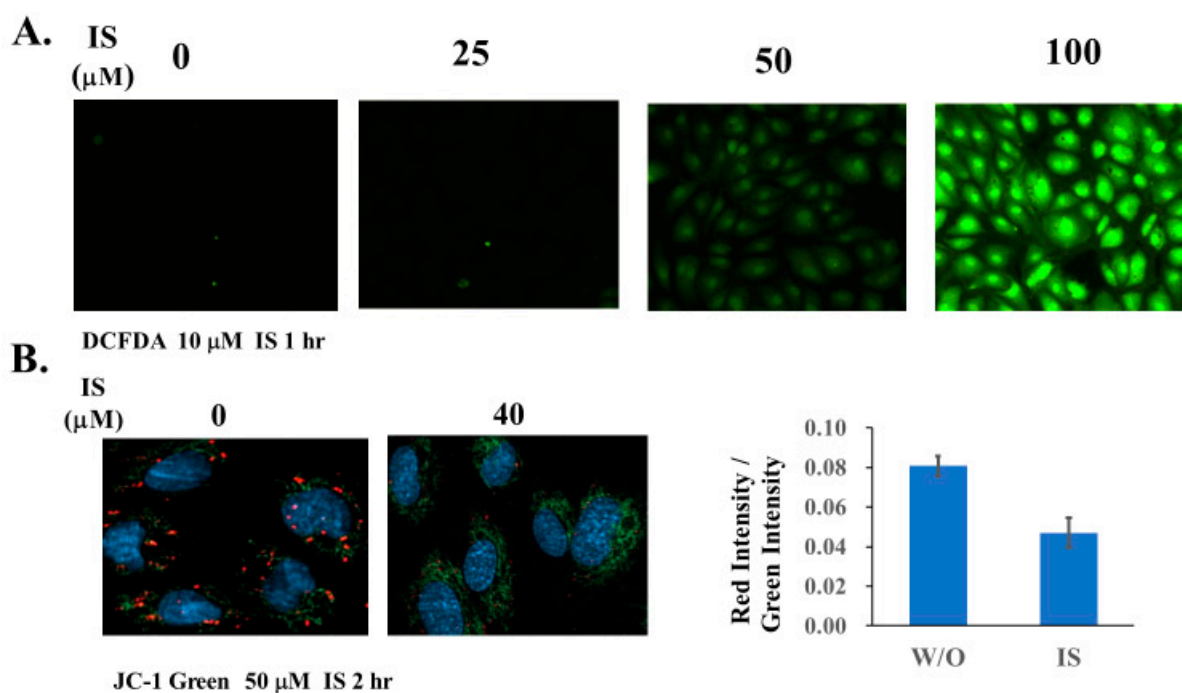

**Supplemental Figure S2. Reactive oxygen species (ROS) generation and mitochondrial dysfunction upon IS exposure.** HUVEC cells were pre-incubated with of 10  $\mu\text{M}$  DCFH-DA before being treated with IS (0, 25, 50 and 100  $\mu\text{M}$ ) for 1 hr. **(A).** The ROS generation was examined using fluorescence microscope visualized with FITC filter. **(B)** The mitochondria's function were examined using Molecular Device's Image Pico plate reader. Cells were pretreated with 1  $\mu\text{M}$  JC-1 Green and 0.1  $\mu\text{M}$  Hoesch 33342 before being treated with 50  $\mu\text{M}$  of IS for 2 hr. The intensities of green (represent dysfunctional mitochondria) and red (represent functional mitochondria) fluorescence were quantified and normalized for number of cells.
